# Supplementary figures and images for: Posttranscriptional control of PLOD1 in adipose-derived stem cells regulates scar formation through altering macrophage polarization
Source: PubMed Central journal article supplement — Ann Transl Med. 2021 Oct;9(20):1573. doi: 10.21037/atm-21-4978 (PMC8576667; doi:10.21037/atm-21-4978), 2021-10

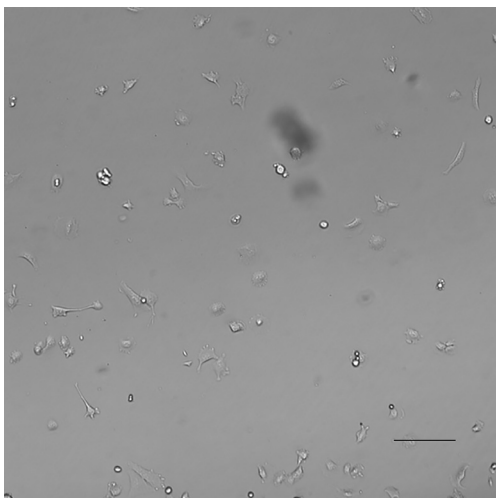

**Figure S1** Representative brightfield images for AMSCs in culture.  
The scale bar is 50  $\mu\text{m}$ .

Supplement: atm-09-20-1573-supplementary.pdf [file atm-09-20-1573-supplementary.pdf]
